# Supplementary material for: Peptide coatings enhance keratinocyte attachment towards improving the peri-implant mucosal seal
Source: Royal Society of Chemistry journal article supplement (doi:10.1039/c8bm00300a), 2018-01-01
Supplement: c8bm00300a1.pdf [file c8bm00300a1.pdf]

## SUPPLEMENTARY FIGURES

### Peptide Coatings Enhance Keratinocyte Attachment towards Improving Peri-implant Mucosal Seal

Vasiliki P. Koidou<sup>1,2</sup>, Prokopios P. Argyris<sup>3</sup>, Erik P. Skoe<sup>1</sup>, Juliana Mota Siqueira<sup>4</sup>, Xi Chen<sup>1</sup>, Lei Zhang<sup>5</sup>,  
Jame E. Hinrichs<sup>2</sup>, Massimo Costalonga<sup>2</sup>, Conrado Aparicio<sup>1,\*</sup>

1. Minnesota Dental Research Center for Biomaterials and Biomechanics (MDRCBB), University of Minnesota, Minneapolis, Minnesota, USA
2. Department of Developmental & Surgical Sciences, Division of Periodontology, University of Minnesota, Minneapolis, Minnesota, USA
3. Department of Diagnostic and Biological Sciences, University of Minnesota, Minneapolis, Minnesota, USA
4. Department of Operative Dentistry and Dental Materials, Federal University of Uberlândia, Uberlândia, Minas Gerais, Brazil.
5. Biostatistical Design and Analysis Center, Clinical and Translational Science Institute, University of Minnesota, Minneapolis, Minnesota, USA

\*Correspondence: Conrado Aparicio, [apari003@umn.edu](mailto:apari003@umn.edu)

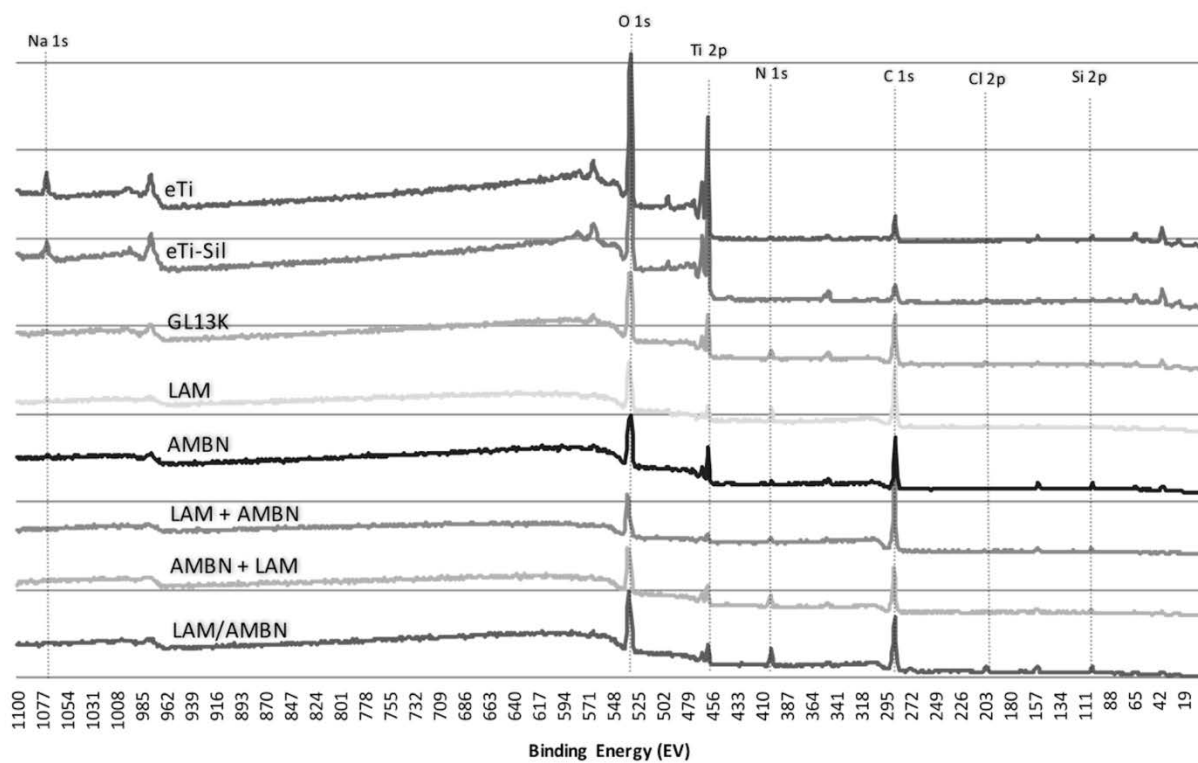

**Figure S1.** Representative XPS survey of all control and biofunctional peptide-coated surfaces before ultrasonication and thermochemical challenges.



**Figure S2.** Representative XPS survey of all control and biofunctional peptide-coated surfaces after ultrasonication in water for 2h.

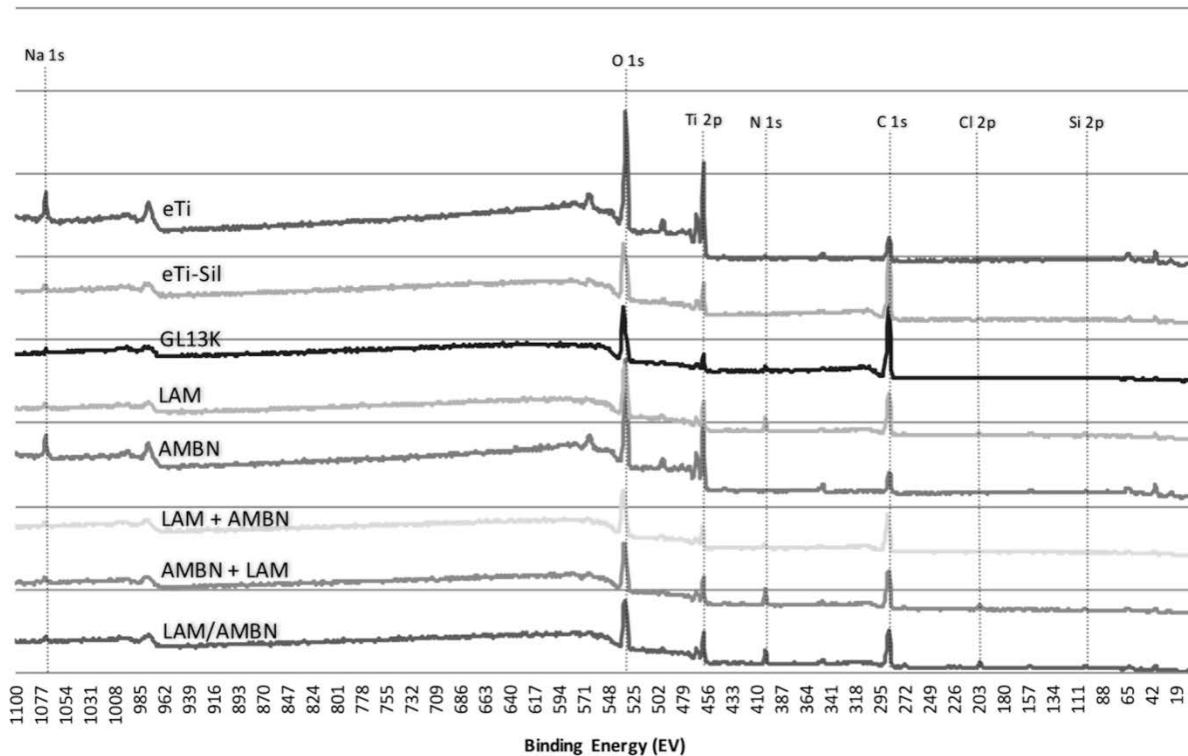

**Figure S3.** Representative XPS survey of all control and biofunctional peptide-coated surfaces after ultrasonication in water for 2h and 8 days of immersion in PBS at 37°C, pH=7.4.

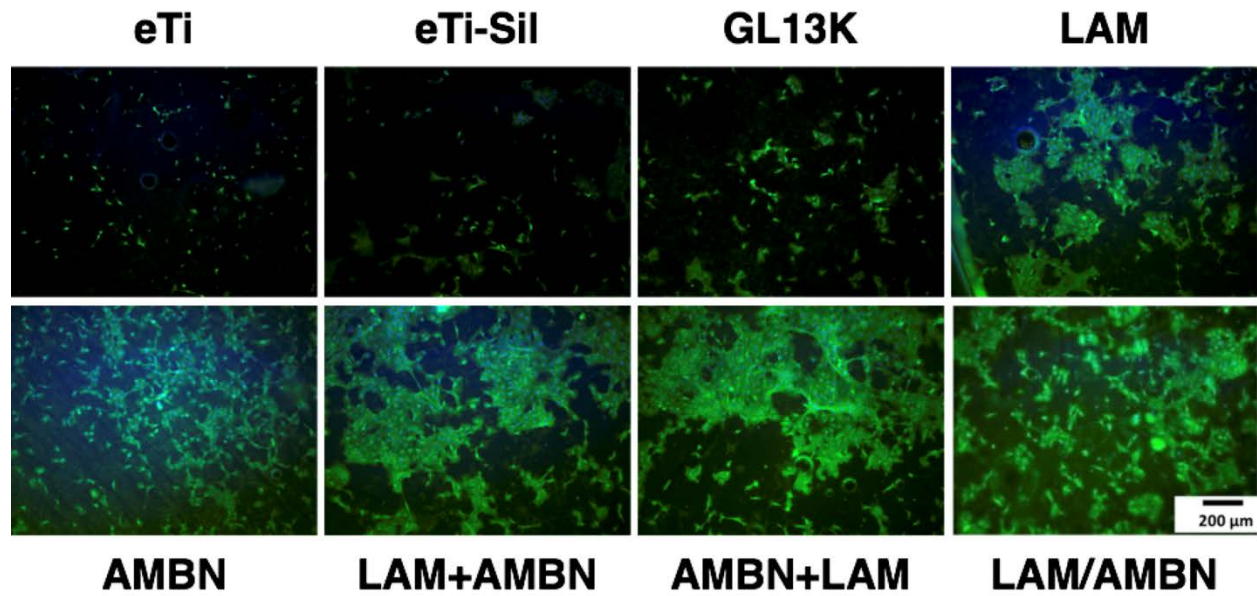

**Figure S4.** Representative images of keratinocyte cells (TERT-2/OKF-6) and expression of hemidesmosome-related protein BP180 on all control and biofunctional peptide-coated Ti surfaces after 48h in culture. Hemidesmosomes were immunofluorescently-labeled in green.
